# Supplementary material
Source: PubMed Central journal article supplement (PMC9097497)

Flynn et al. (BERTOZZI) Figure S1

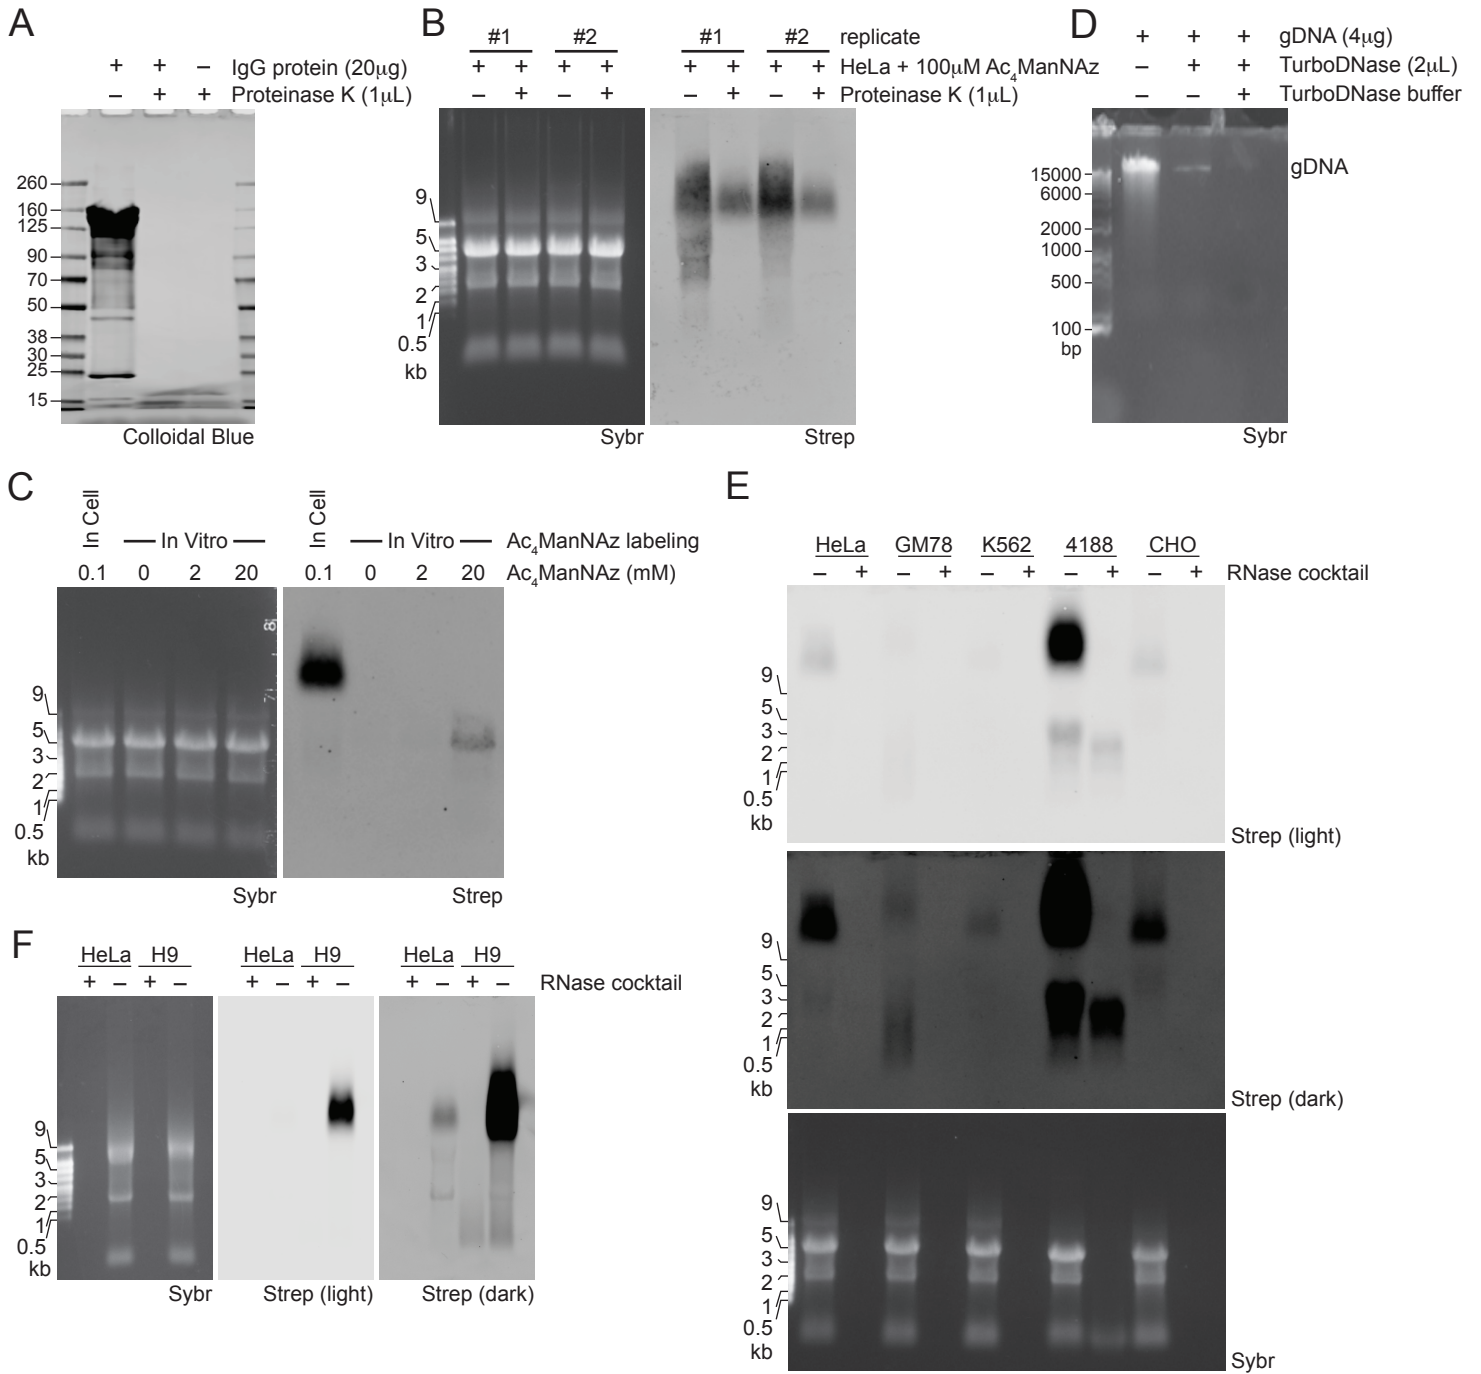

Supplement: NIHMS1695402-supplement-1.pdf [file NIHMS1695402-supplement-1.pdf]

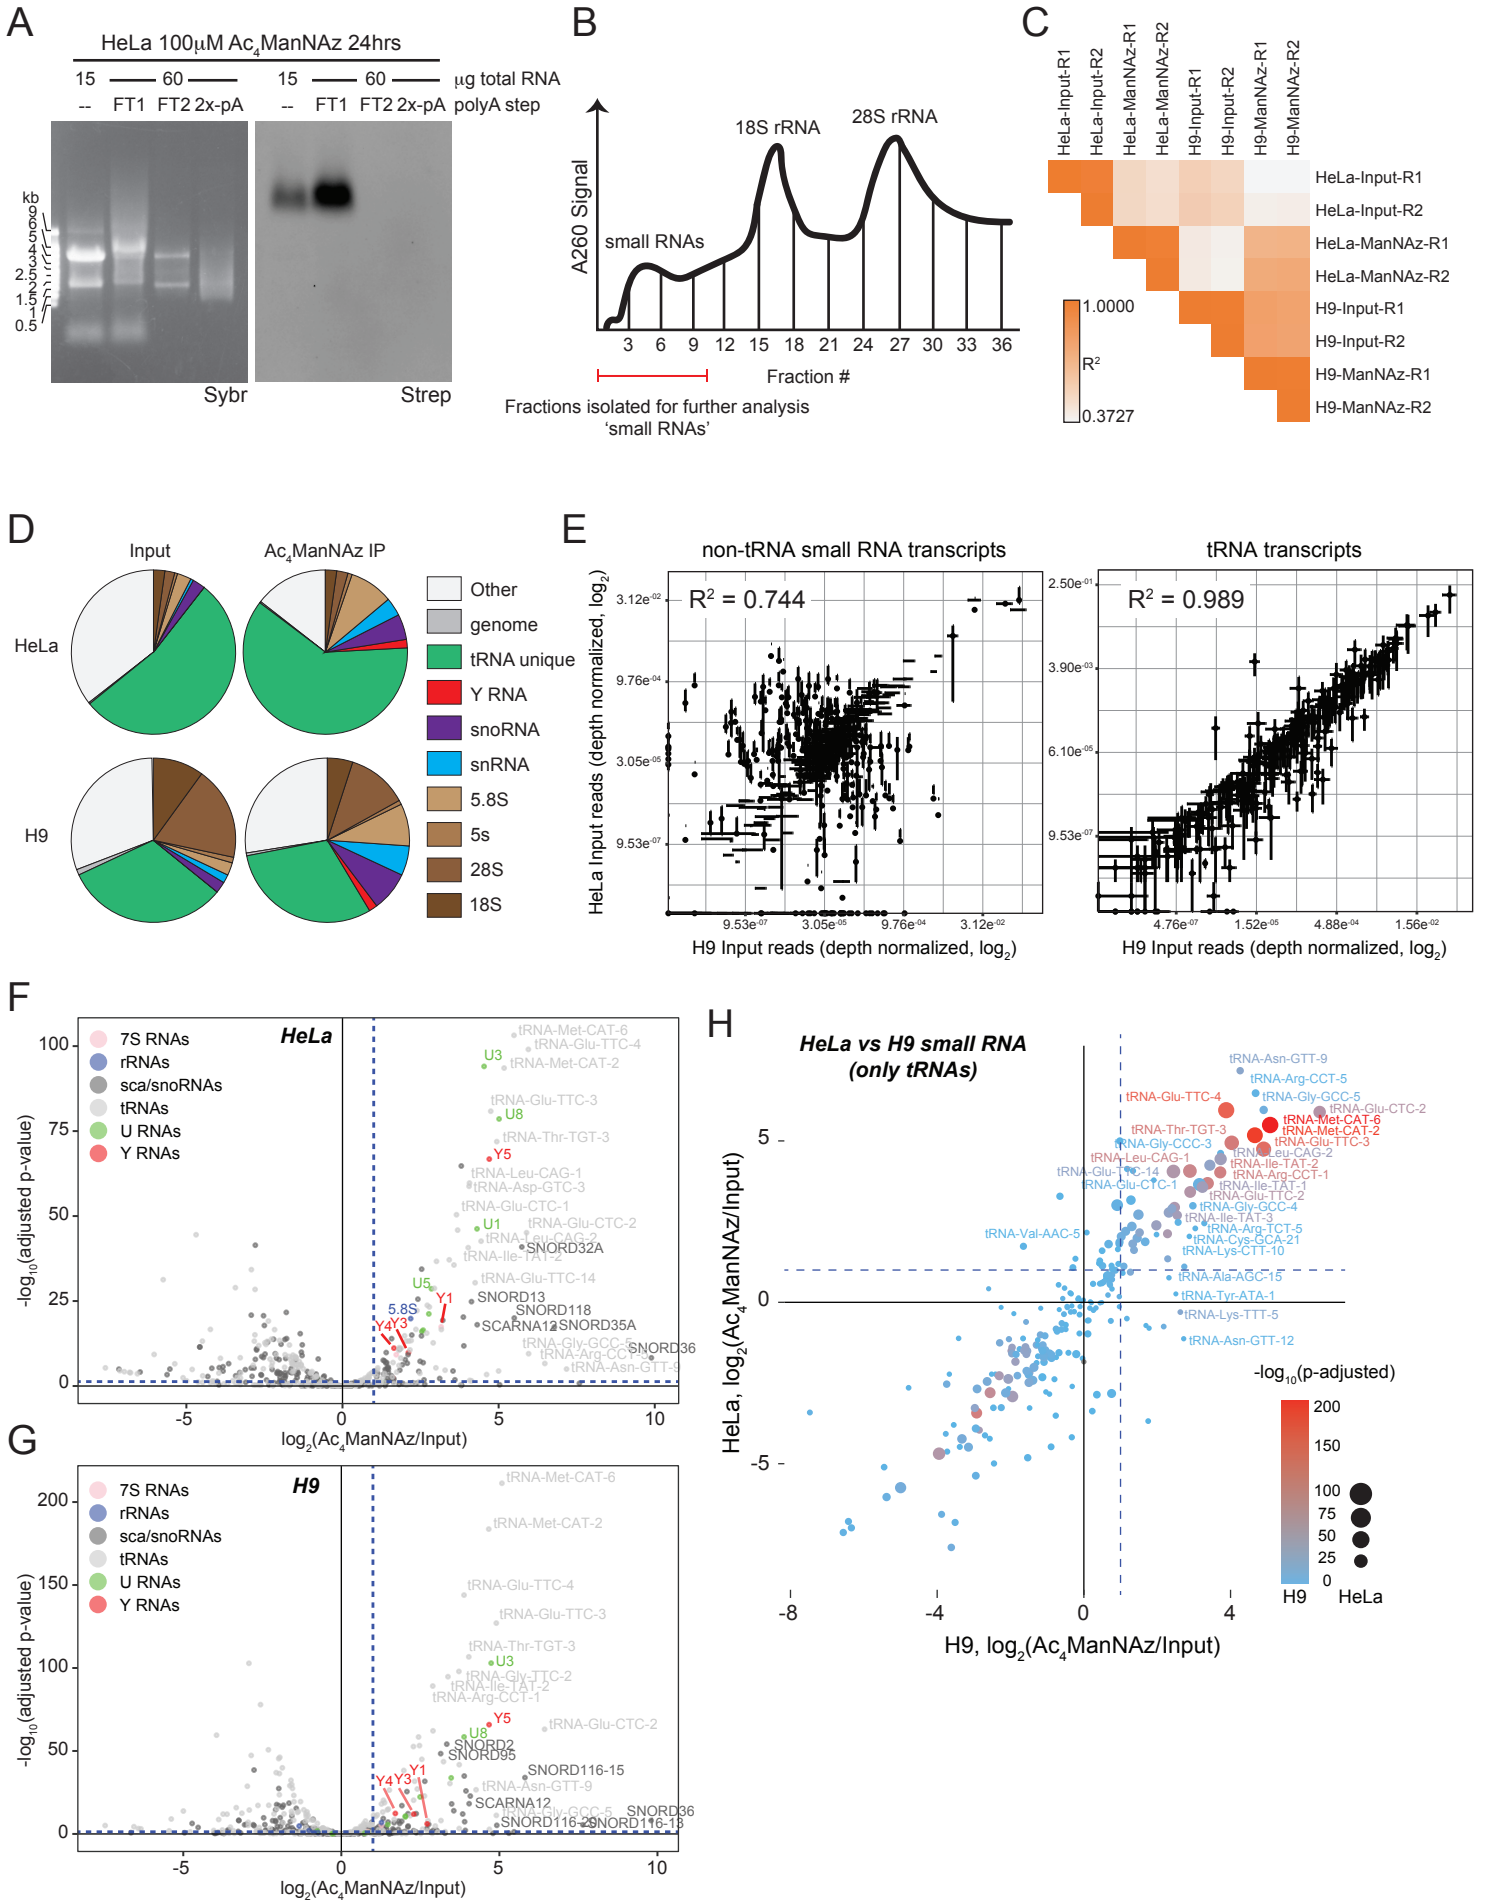

Supplement: NIHMS1695402-supplement-2.pdf [file NIHMS1695402-supplement-2.pdf]

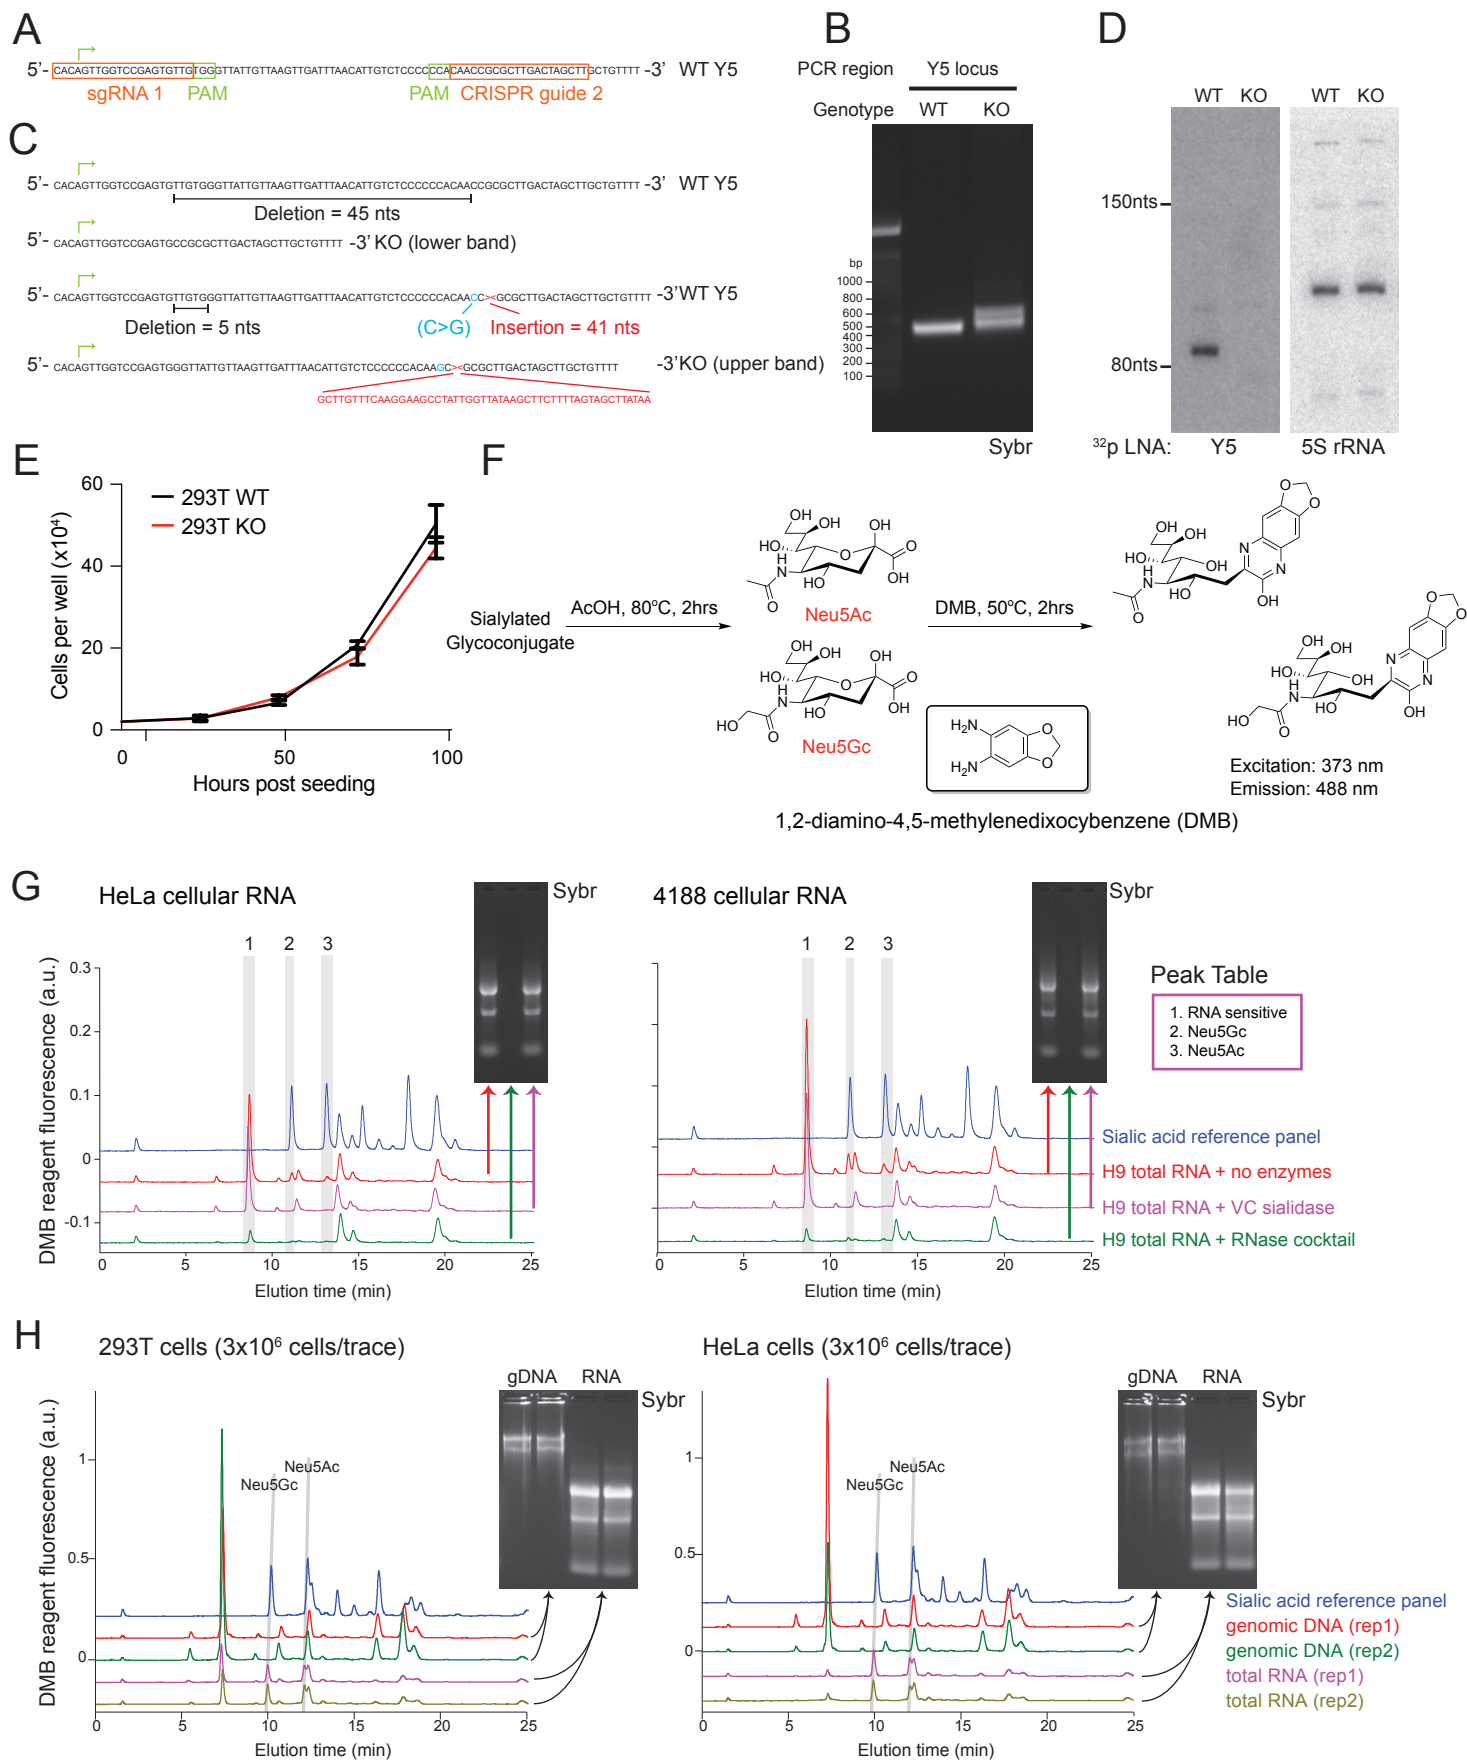

Supplement: NIHMS1695402-supplement-3.pdf [file NIHMS1695402-supplement-3.pdf]

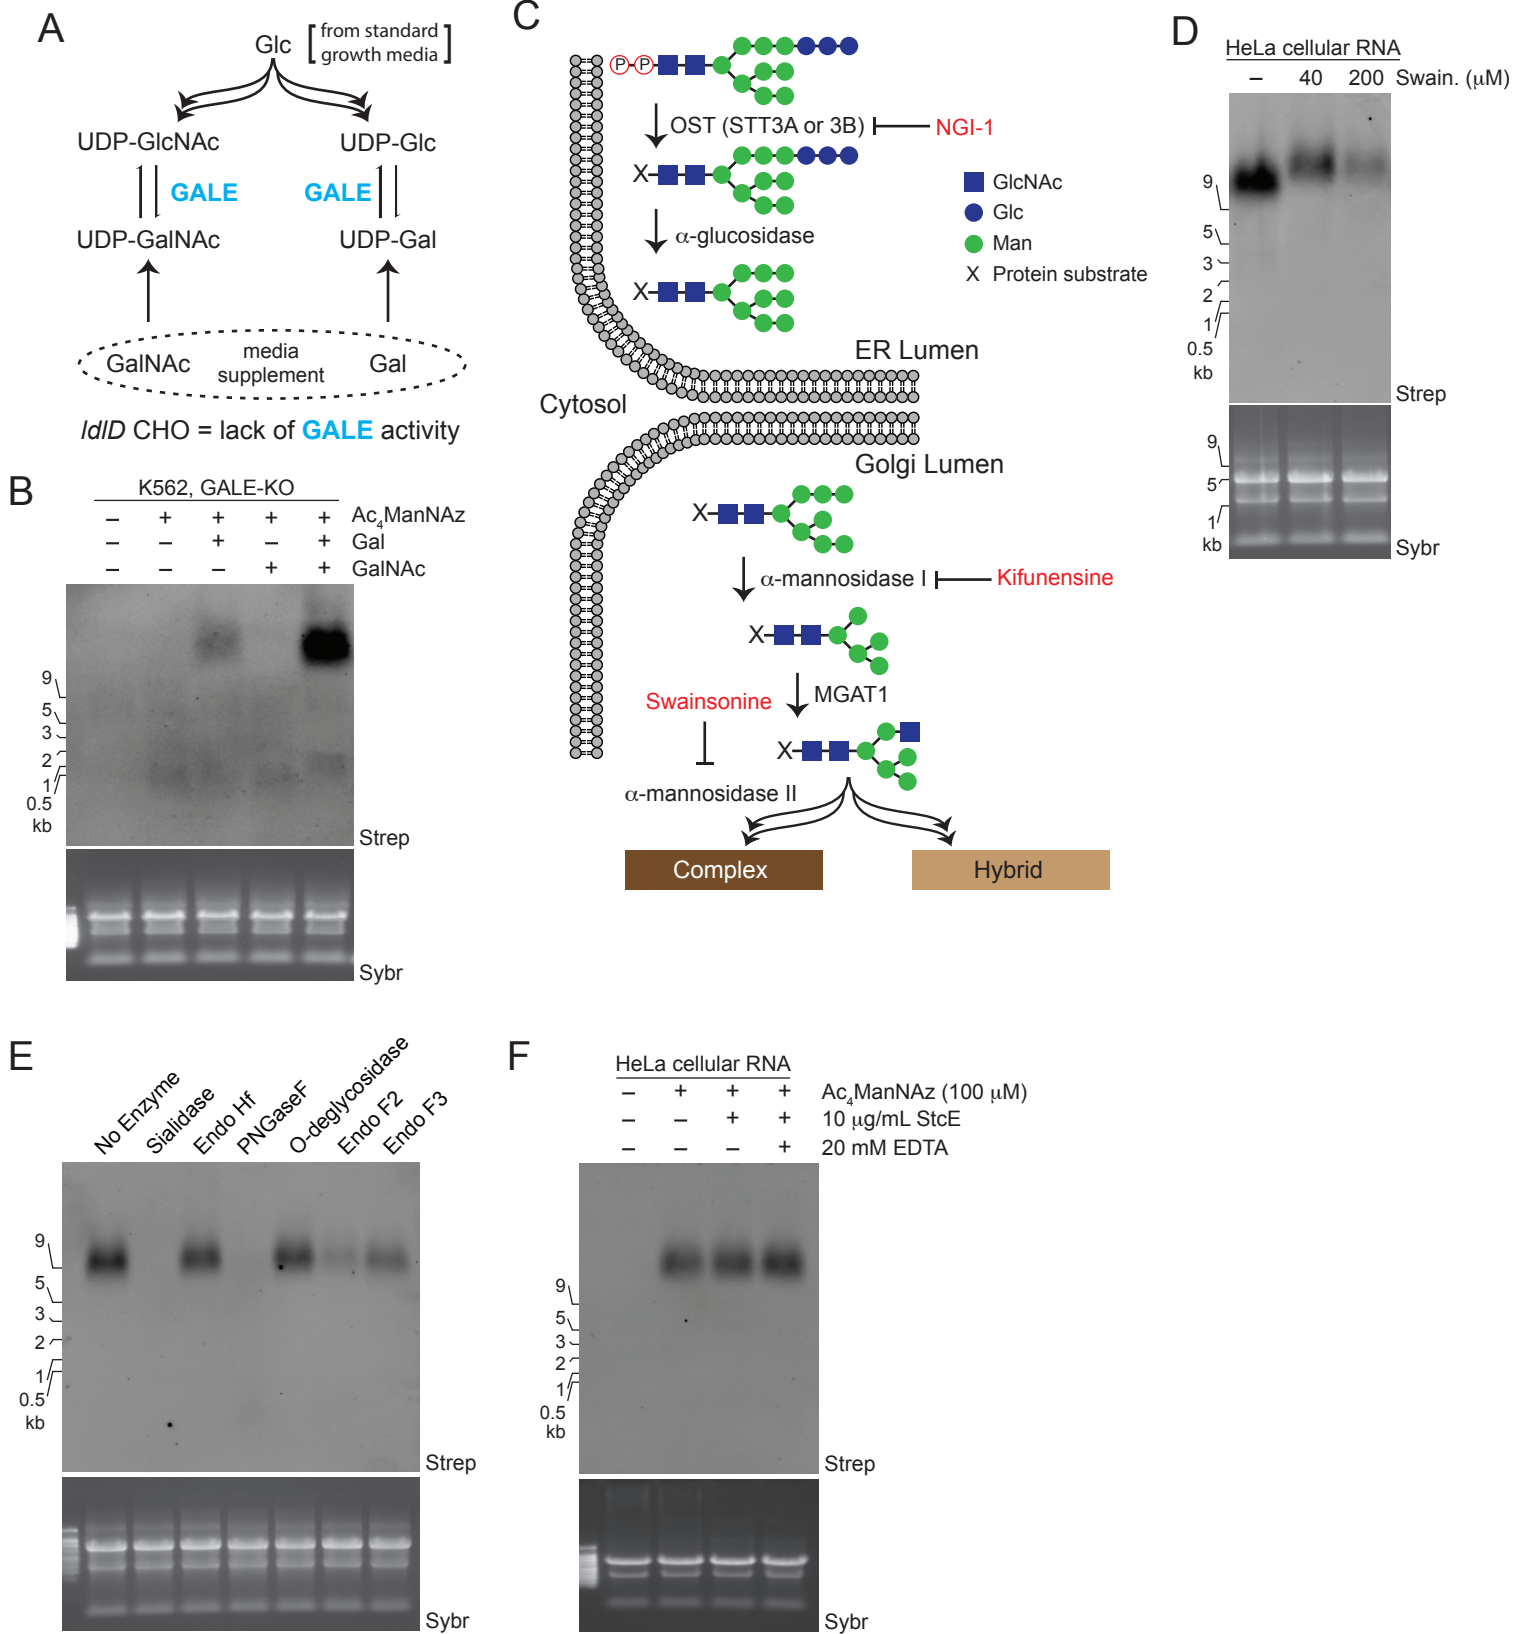

Supplement: NIHMS1695402-supplement-4.pdf [file NIHMS1695402-supplement-4.pdf]

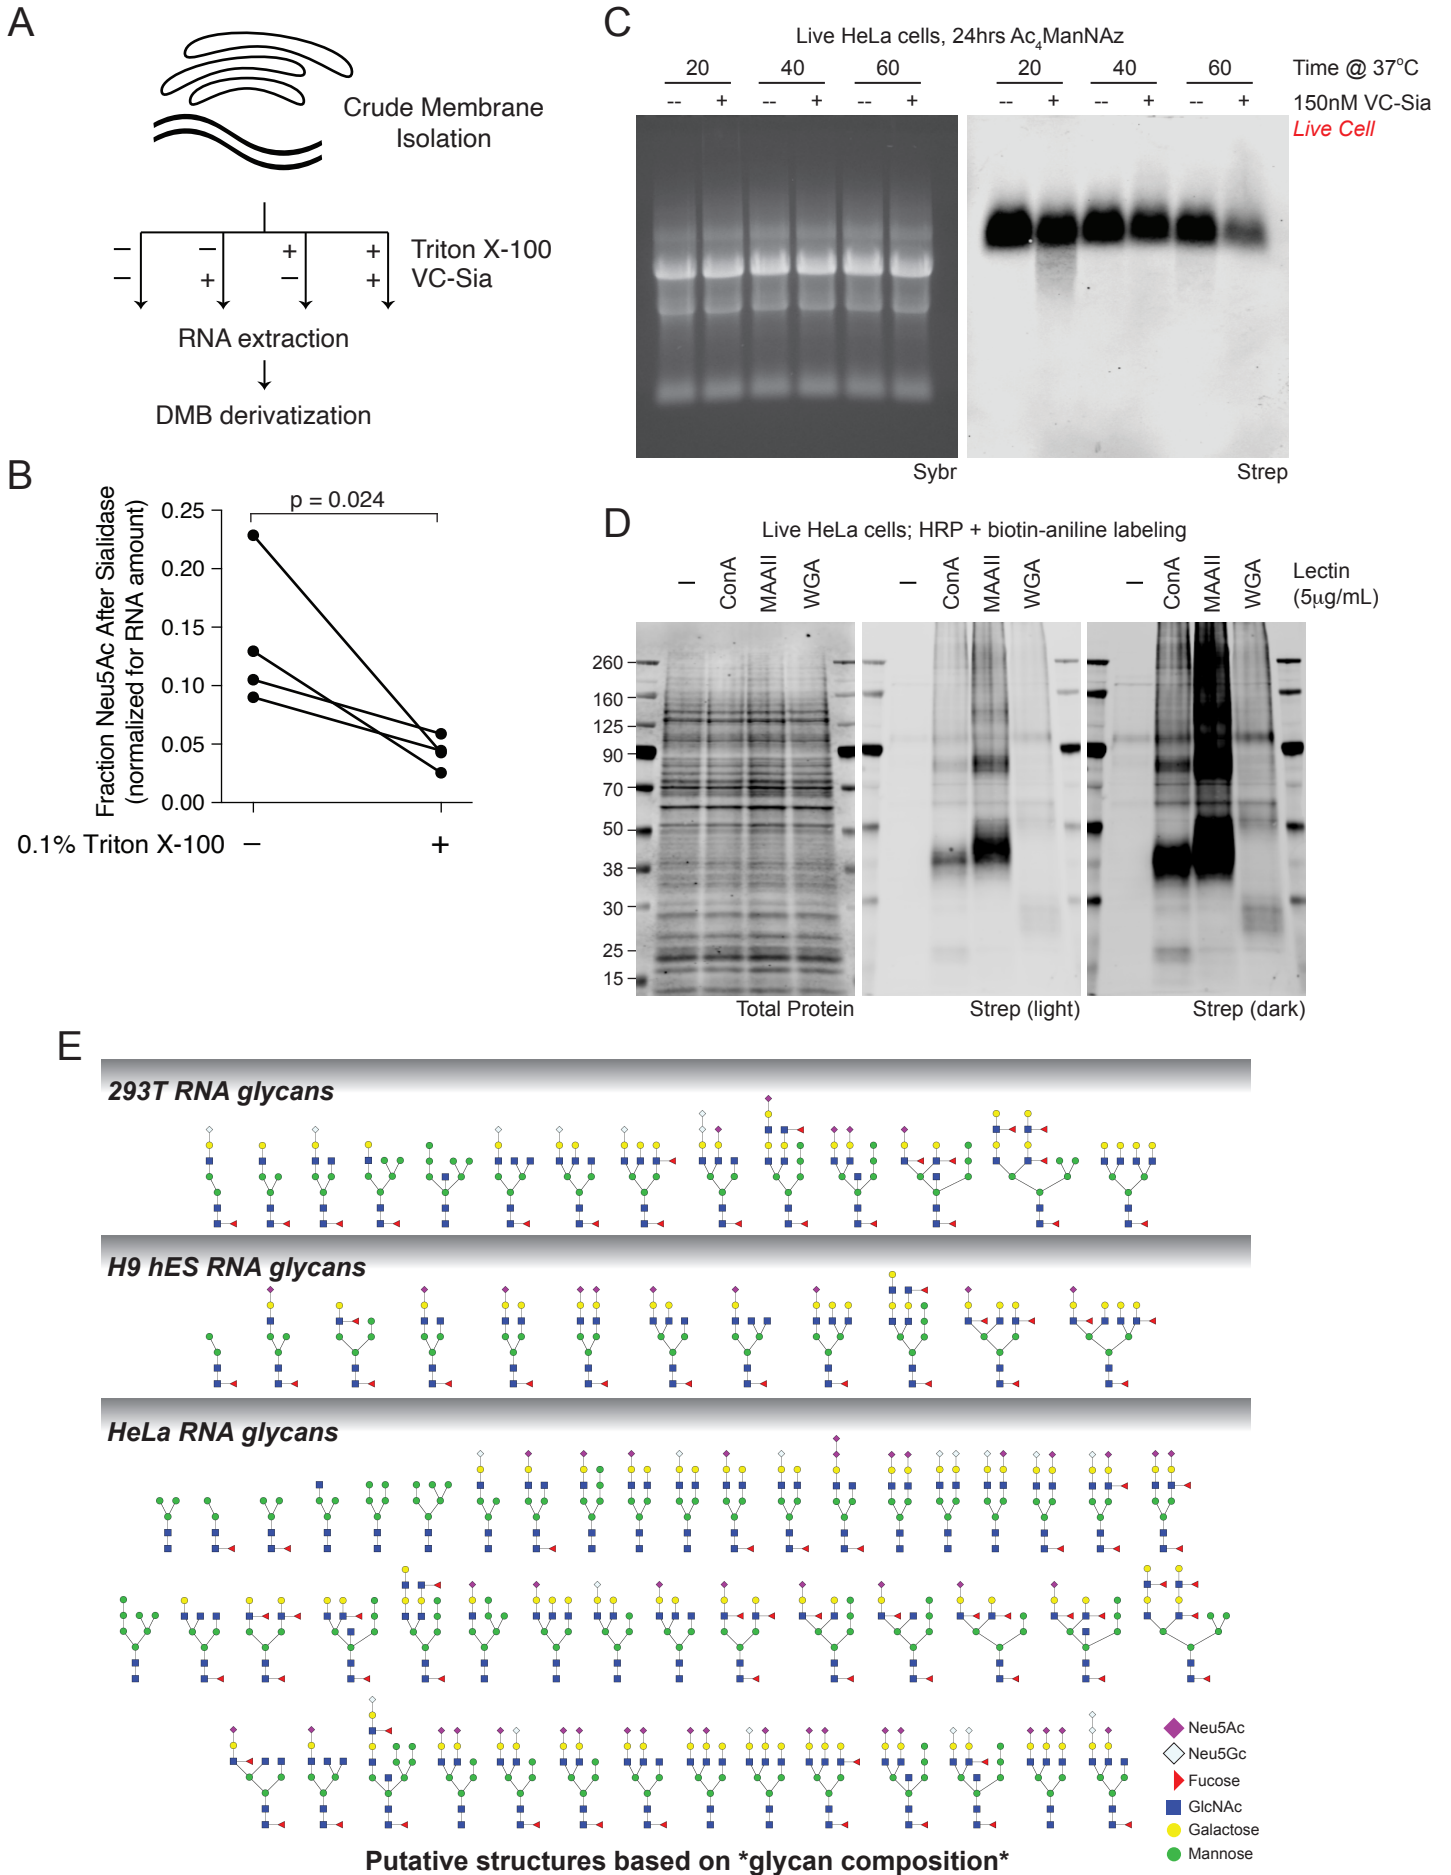

Supplement: NIHMS1695402-supplement-5.pdf [file NIHMS1695402-supplement-5.pdf]

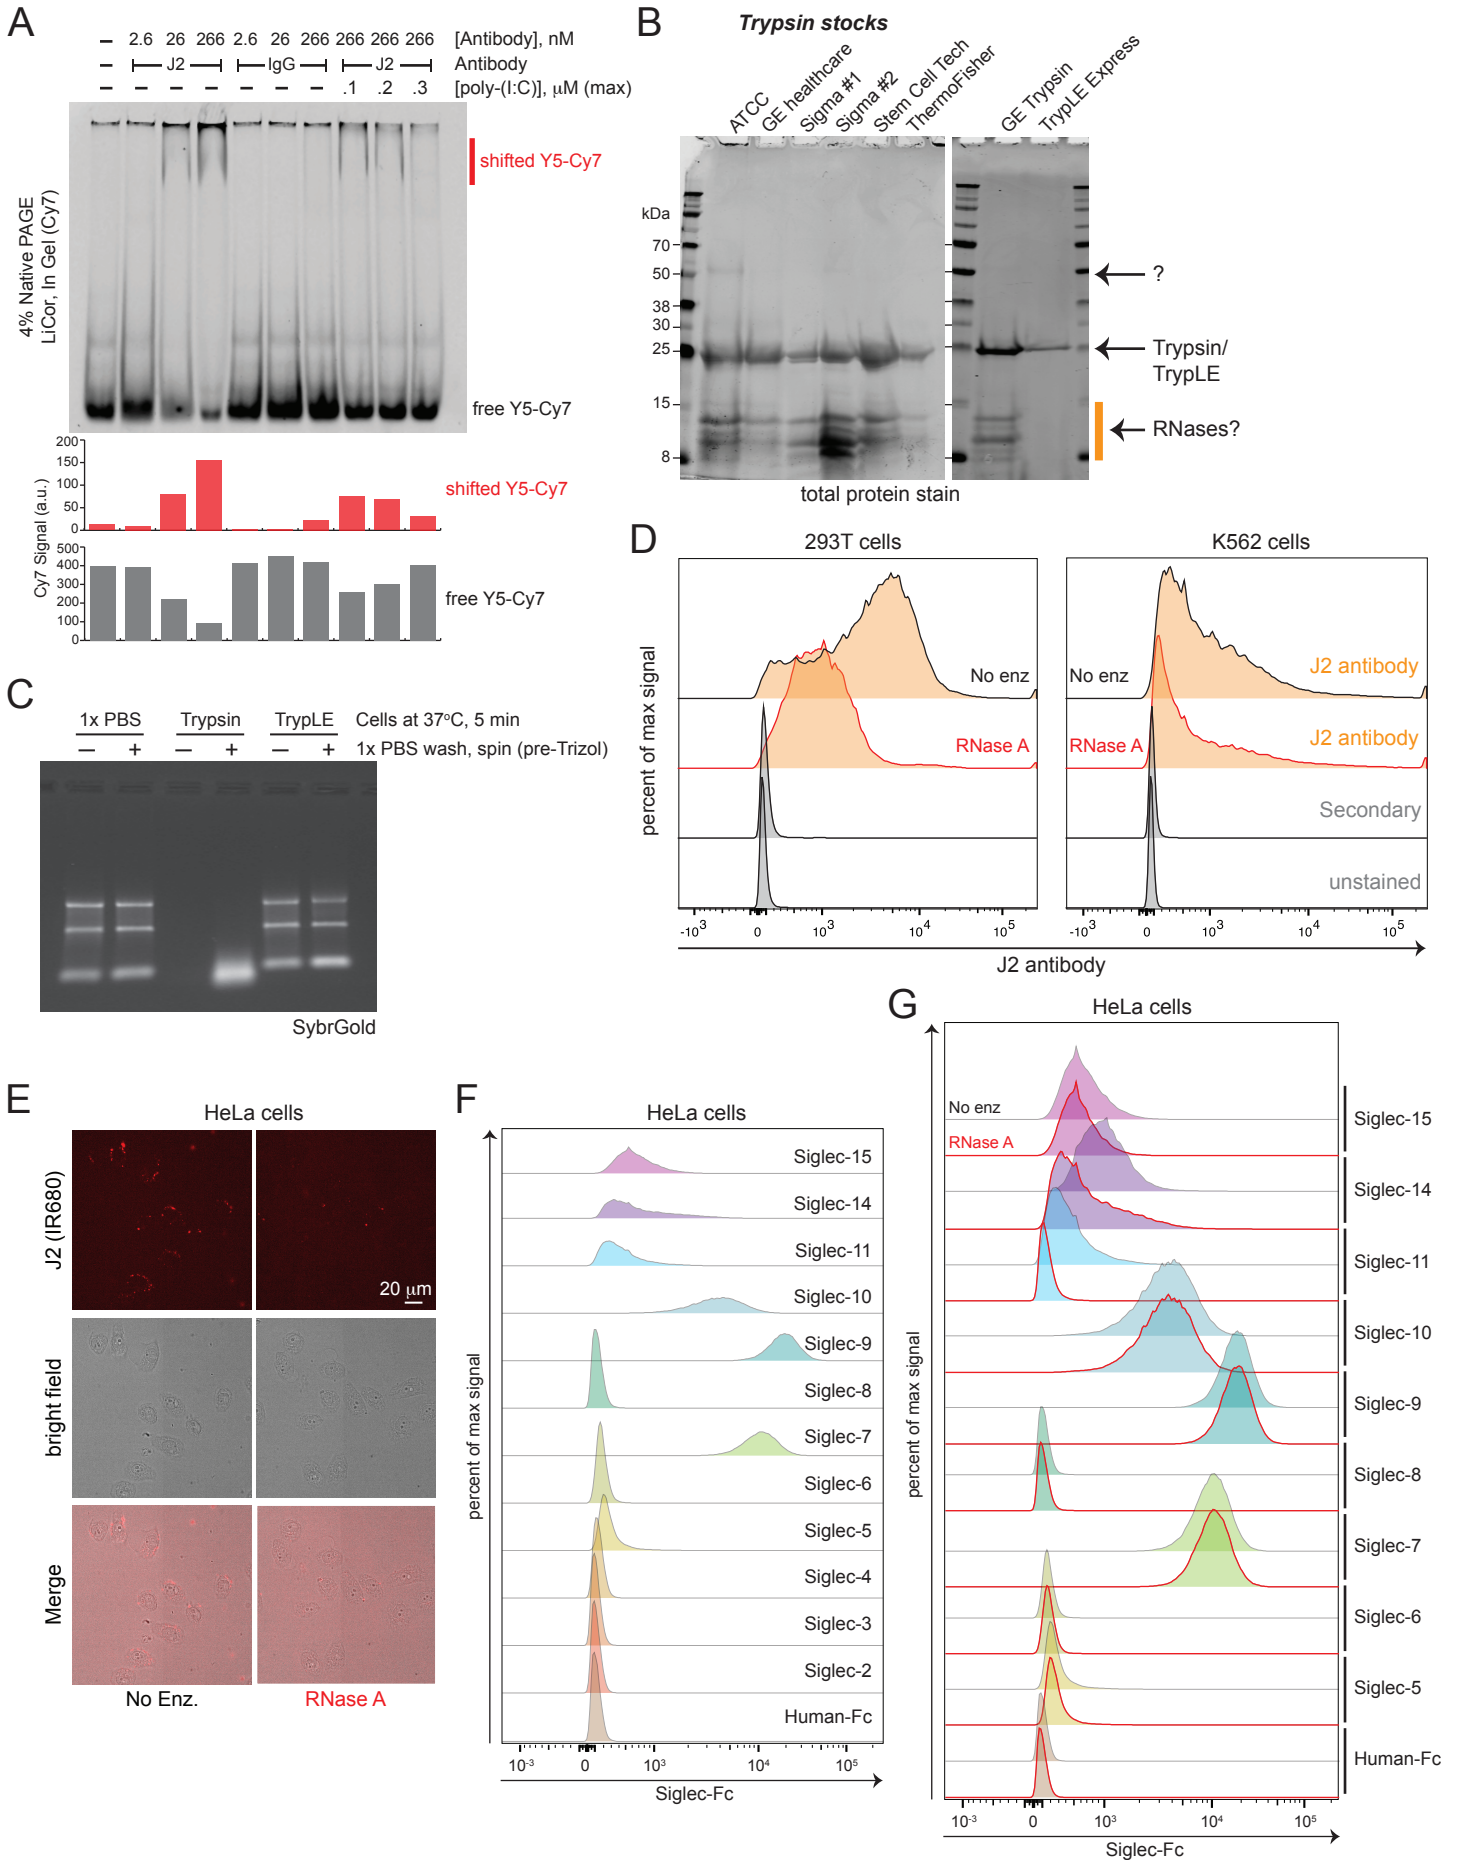

Supplement: NIHMS1695402-supplement-6.pdf [file NIHMS1695402-supplement-6.pdf]
